# Supplementary material for: Interpretable and Predictive Deep Neural Network Modeling of the SARS-CoV-2 Spike Protein Sequence to Predict COVID-19 Disease Severity
Source: MDPI journal article supplement (doi:10.3390/biology11121786), 2022-12-08
Supplement: s1 [file s1]

| Original                                                               | Mapped Value                 |
|------------------------------------------------------------------------|------------------------------|
| 18                                                                     | Unknown                      |
| 28                                                                     | Unknown                      |
| 37                                                                     | Unknown                      |
| 38                                                                     | Unknown                      |
| 42                                                                     | Unknown                      |
| 43                                                                     | Unknown                      |
| 44                                                                     | Unknown                      |
| 45                                                                     | Unknown                      |
| 51                                                                     | Unknown                      |
| 54                                                                     | Unknown                      |
| 55                                                                     | Unknown                      |
| 58                                                                     | Unknown                      |
| 59                                                                     | Unknown                      |
| 61                                                                     | Unknown                      |
| 67                                                                     | Unknown                      |
| 68                                                                     | Unknown                      |
| 71                                                                     | Unknown                      |
| 103                                                                    | Unknown                      |
| Active                                                                 | Active                       |
| Active case                                                            | Active                       |
| Acute bronchitis                                                       | Acute infection              |
| Acute upper respiratory infection, unspecified                         | Acute infection              |
| Acute upper respiratory infections                                     | Acute infection              |
| Acute upper respiratory tract infection, unspecified                   | Acute infection              |
| acute viral respiratory infection                                      | Acute infection              |
| Admitted for 6 Days in Bharatpur Hospital                              | Hospitalized                 |
| Airport surveillance                                                   | Screening                    |
| Alive                                                                  | Alive                        |
| Ambulant                                                               | Ambulatory                   |
| Ambulatoriale                                                          | Ambulatory                   |
| Ambulatory                                                             | Ambulatory                   |
| AMBULATORY - UNDER TREATMENT                                           | Ambulatory / Under treatment |
| Ambulatory symptomatic                                                 | Mild                         |
| Ambulatory treatment                                                   | Ambulatory                   |
| Amublant                                                               | Ambulatory                   |
| Animal showing generalized sickness                                    | Unknown                      |
| ARV clinic                                                             | Unknown                      |
| Asympomatic                                                            | Asymptomatic                 |
| asymptomatic                                                           | Asmptomatic                  |
| Asymptomatic - Ambulatory                                              | Asymptomatic                 |
| Asymptomatic ambulatory                                                | Asymptomatic                 |
| Asymptomatic and Ambulatory                                            | Asymptomatic                 |
| Asymptomatic, identified as positive during preoperation investigation | Asymptomatic                 |
| Asymptomatic/Mild                                                      | Asymptomatic/Mild            |
| Asymptomatic/Released                                                  | Asymptomatic                 |
| Asymptomatyc                                                           | Asymptomatic                 |
| Asymtomatic                                                            | Asymptomatic                 |
| Aymptomatic                                                            | Asymptomatic                 |
| B34.2 Coronavirus infection, unspecified site                          | Unknown                      |
| Blank                                                                  | Unknown                      |
| Bronchitis                                                             | Bronchitis                   |
| Bronchoalveolar lavage                                                 | Unknown                      |
| Casualty                                                               | Casualty                     |
| Chronic dialysis                                                       | Unknown                      |
| Clinic                                                                 | Unknown                      |
| Clinical signs                                                         | Symptomatic                  |
| Cluster                                                                | Unknown                      |
| Community screening                                                    | Screening                    |
| Community Surveillance                                                 | Screening                    |
| Confirmed                                                              | Unknown                      |
| Confirmed SAD                                                          | Unknown                      |
| Confirmed SAD-SAD                                                      | Unknown                      |
| Confirmed SCTE                                                         | Unknown                      |
| Conjunctivitis                                                         | Mild                         |
| Contact                                                                | Screening                    |
| Contact and possible infection with other infectious diseases          | Screening                    |
| Contact surveillance                                                   | Screening                    |

|                                                                       |              |
|-----------------------------------------------------------------------|--------------|
| Contact with and exposure to other communicable diseases              | Screening    |
| Contact-SAD                                                           | Screening    |
| Contained                                                             | Unknown      |
| Coronavirus infection                                                 | Unknown      |
| Cough                                                                 | Mild         |
| COVID-19                                                              | Unknown      |
| Critical                                                              | Critical     |
| critical care admitted                                                | Severe       |
| Culled for pelting                                                    | Unknown      |
| Cured                                                                 | Recovered    |
| DAMA                                                                  | Unknown      |
| Dead                                                                  | Dead         |
| dead or alive, hospitalised or release                                | Unknown      |
| Dead, hospitalized                                                    | Dead         |
| Death                                                                 | Dead         |
| Decease                                                               | Dead         |
| Deceased                                                              | Dead         |
| Deceased (BID)                                                        | Dead         |
| Deceased (Brought in Dead)                                            | Dead         |
| Decreased                                                             | Dead         |
| Demise                                                                | Dead         |
| Demised                                                               | Dead         |
| Demised patient                                                       | Dead         |
| Demised patient (Vaccinated first dose)                               | Dead         |
| Desceased                                                             | Dead         |
| Deseased                                                              | Dead         |
| Died                                                                  | Dead         |
| Discharged                                                            | Released     |
| Discharged after recovery                                             | Released     |
| Diseased                                                              | Symptomatic  |
| Domestic infection                                                    | Unknown      |
| EHPAD                                                                 | Unknown      |
| EHPAD_IRA                                                             | Unknown      |
| Emergency care                                                        | Hospitalized |
| Encounter for general adult medical examination                       | Screening    |
| Encounter for general adult medical examination (Z.00)                | Screening    |
| Encounter for observation for other suspected diseases and conditions | Symptomatic  |
| Encounter for other specified special examinations (Z01.8)            | Unknown      |
| Epidemiology Study                                                    | Screening    |
| Etude                                                                 | Unknown      |
| Exitus                                                                | Dead         |
| Expired                                                               | Dead         |
| Facility quarantine                                                   | Screening    |
| Family medical ward                                                   | Hospitalized |
| Fatal                                                                 | Dead         |
| Female                                                                | Unknown      |
| Fever                                                                 | Mild         |
| Flu-like symptoms                                                     | Flu-like     |
| General clinic                                                        | Unknown      |
| General Medical Screening                                             | Screening    |
| HCW - Mild Covid                                                      | Mild         |
| Headache                                                              | Mild         |
| Headache, Nasal Congestions and generalised body ache                 | Mild         |
| Healthcare worker                                                     | Unknown      |
| Healthworker                                                          | Unknown      |
| Helen Joseph ward                                                     | Unknown      |
| High temperature                                                      | Mild         |
| Home                                                                  | Home         |
| Home Isolation                                                        | Home         |
| Hopsitalized                                                          | Hospitalized |
| Hospitalized                                                          | Hospitalized |
| Hospatalized                                                          | Hospitalized |
| Hospetalized                                                          | Hospitalized |
| Hospitalized                                                          | Hospitalized |
| Hospital discharge                                                    | Released     |
| Hospitalised                                                          | Hospitalized |
| Hospitalised oncology urology                                         | Hospitalized |
| Hospitalised-live                                                     | Hospitalized |
| Hospitalised, Reinfection                                             | Hospitalized |

|                                                                        |                             |
|------------------------------------------------------------------------|-----------------------------|
| HOSPITALIZADO                                                          | Hospitalized                |
| hospitalized                                                           | Hospitalized                |
| Hospitalized - Non-Serious Case                                        | Hospitalized / Not Serious  |
| HOSPITALIZED - SERIOUS CASE                                            | Hospitalized / Serious      |
| Hospitalized -ICU-critical                                             | Severe                      |
| Hospitalized (Critical)                                                | Hospitalized / Serious      |
| Hospitalized (Deceased)                                                | Dead                        |
| Hospitalized (ICU)                                                     | Severe                      |
| Hospitalized (Intensive care unit and Released)                        | Severe                      |
| Hospitalized (Intensive care unit)                                     | Severe                      |
| Hospitalized (Live)                                                    | Hospitalized                |
| Hospitalized (Mild)                                                    | Hospitalized / Mild         |
| Hospitalized (Moderate)                                                | Hospitalized / Moderate     |
| Hospitalized (possible MIS-C)                                          | Hospitalized / Serious      |
| Hospitalized (Released)                                                | Released                    |
| Hospitalized (Severe)                                                  | Severe                      |
| Hospitalized (Stable)                                                  | Hospitalized / Stable       |
| Hospitalized / ICU                                                     | Severe                      |
| Hospitalized / Rawat Inap                                              | Hospitalized                |
| Hospitalized Asymptomatic                                              | Asymptomatic / Hospitalized |
| Hospitalized in intensive care                                         | Severe                      |
| Hospitalized Symptomatic                                               | Hospitalized / Symptomatic  |
| Hospitalized, Asymptomatic, Alive                                      | Asymptomatic / Hospitalized |
| Hospitalized, Deceased                                                 | Dead                        |
| Hospitalized, Discharged, Alive                                        | Released                    |
| Hospitalized, ICU                                                      | Severe                      |
| Hospitalized, ICU, diseased                                            | Dead                        |
| Hospitalized, ICU, Died                                                | Dead                        |
| Hospitalized, Live                                                     | Hospitalized                |
| Hospitalized, Live.                                                    | Hospitalized                |
| Hospitalized, no clinical signs                                        | Asymptomatic / Hospitalized |
| Hospitalized, noninvasive ventilation                                  | Hospitalized                |
| Hospitalized, oxygenotherapy, diarrhea                                 | Hospitalized                |
| Hospitalized, Pregnant                                                 | Hospitalized                |
| Hospitalized, referred to Nepalganj Teaching hospital, stayed for 10 d | Hospitalized                |
| Hospitalized(ICU)                                                      | Severe                      |
| Hospitalizede                                                          | Hospitalized                |
| Hospitalizes                                                           | Hospitalized                |
| Hospitallized                                                          | Hospitalized                |
| Hospitarized                                                           | Hospitalized                |
| Hospitilized                                                           | Hospitalized                |
| Hospitalized                                                           | Hospitalized                |
| Hospitalized                                                           | Hospitalized                |
| House assistance, Symptomatic                                          | House Assistance            |
| Human                                                                  | Unknown                     |
| ICD-10 Disease: B34.2 Coronavirus infection, unspecified               | Unknown                     |
| ICD-10 Disease: B34.2 Coronavirus infection, unspecified site          | Unknown                     |
| ICD-10 Disease: J00- Acute nasopharyngitis [common cold]               | Mild                        |
| ICD-10 Disease: J00-J06 Acute upper respiratory infections             | Acute infection             |
| ICD-10 Disease: J02.9 Acute pharyngitis, unspecified                   | Acute infection             |
| ICD-10 Disease: J06.8 Other acute upper respiratory infections of mult | Acute infection             |
| ICD-10 Disease: J06.9 Acute upper respiratory infection, unspecified   | Acute infection             |
| ICD-10 Disease: J18.1 Lobar pneumonia, unspecified organism            | Pneumonia                   |
| ICD-10 Disease: J18.9 Pneumonia, unspecified organism                  | Pneumonia                   |
| ICD-10 Disease: J40 Bronchitis, not specified as acute or chronic      | Bronchitis                  |
| ICD-10 Disease: U07.1 COVID-19, virus identified                       | Unknown                     |
| ICD-10 Disease: U07.2 COVID-19, virus not identified                   | Unknown                     |
| ICD-10 Disease: U07.2 Virus not identified                             | Unknown                     |
| ICD-10 Disease: Z00.0 Encounter for general adult medical examination  | Unknown                     |
| ICD-10 Disease: Z00.0 Encounter for general adult medical examination  | Symptomatic                 |
| ICD-10 Disease: Z03.8 Encounter for observation for other suspected d  | Symptomatic                 |
| ICD-10 Disease: Z03.8 Observation for other suspected diseases and c   | Symptomatic                 |
| ICD-10 Disease: Z04 Encounter for examination and observation for ot   | Unknown                     |
| ICD-10 Disease: Z04.8 Encounter for examination and observation for    | Unknown                     |
| ICD-10 Disease: Z10.8 Routine general health check-up of other define  | Unknown                     |
| ICD-10 Disease: Z11.5 Encounter for screening for other viral diseases | Unknown                     |
| ICD-10 Disease: Z20.8 Contact with and exposure to other communica     | Screening                   |
| ICD-10 Disease:J06.9 Acute upper respiratory infection, unspecified    | Acute infection             |
| ICD-10 Disease:Pneumonia                                               | Pneumonia                   |

|                                                                                   |                      |
|-----------------------------------------------------------------------------------|----------------------|
| ICD-10 Disease:Z00.00 Encounter for general adult medical examination             | Asymptomatic         |
| ICU                                                                               | Severe               |
| ICU, Deceased                                                                     | Dead                 |
| ICU, Live                                                                         | ICU                  |
| ICU; Serious                                                                      | ICU                  |
| Immunocompromised                                                                 | Unknown              |
| In-hospital                                                                       | Hospitalized         |
| In-patient                                                                        | Hospitalized         |
| Infection after vaccine/Live                                                      | Unknown / Vaccinated |
| Influenza Like Illness                                                            | Flu-like             |
| Initially hospitalized, but now improved and discharged                           | Released             |
| unknown                                                                           | Unknown              |
| Inpatient                                                                         | Hospitalized         |
| Intensive Care                                                                    | Severe               |
| Intensive Care Unit                                                               | ICU                  |
| Isolation                                                                         | Unknown              |
| J02.9 Acute pharyngitis, unspecified                                              | Acute Infection      |
| J03.9 Acute tonsillitis, unspecified                                              | Acute Infection      |
| J04.1 Acute tracheitis                                                            | Acute infection      |
| J04.2 Acute laryngotracheitis                                                     | Acute Infection      |
| J06 Acute upper respiratory infections of multiple and unspecified sites          | Acute Infection      |
| J06.8 Other acute upper respiratory infections of multiple sites                  | Acute Infection      |
| J06.9 Acute upper respiratory infection, unspecified                              | Acute Infection      |
| J12.9 Viral pneumonia, unspecified                                                | Pneumonia            |
| J18 Bronchopneumonia, unspecified                                                 | Pneumonia            |
| J18.8 Other pneumonia, organism unspecified                                       | Pneumonia            |
| J18.9 Pneumonia, unspecified                                                      | Pneumonia            |
| J22. Unspecified acute lower respiratory infection                                | Acute infection      |
| J41 Simple chronic bronchitis                                                     | Acute Infection      |
| J81 Pulmonary oedema                                                              | Pneumonia            |
| live                                                                              | Alive                |
| Live / Hidup                                                                      | Alive                |
| Live, acute respiratory infection                                                 | Acute infection      |
| Live, ambulatory care                                                             | Ambulatory           |
| Live, asymptomatic                                                                | Asymptomatic         |
| Live, hospitalized                                                                | Hospitalized         |
| Live, mild fever and weakness                                                     | Mild                 |
| Live, mild symptoms, at home                                                      | Mild                 |
| Live, not hospitalized                                                            | Not hospitalized     |
| Live, Not Hospitalized.                                                           | Not hospitalized     |
| Live, physical examination                                                        | Screening            |
| Live, Recovered                                                                   | Recovered            |
| Live, symptomatic                                                                 | Symptomatic          |
| Live.                                                                             | Alive                |
| Live. Ambulatory                                                                  | Ambulatory           |
| Live. Not hospitalized                                                            | Not hospitalized     |
| Lived                                                                             | Alive                |
| lLive                                                                             | Alive                |
| M62.9 Disorder of muscle, unspecified, high temperature                           | Symptomatic          |
| Male                                                                              | Unknown              |
| Mild                                                                              | Mild                 |
| Mild - not requiring supplementary oxygen                                         | Mild                 |
| Mild / Contact exposure / Asymptomatic                                            | Asymptomatic / Mild  |
| Mild clinical signs                                                               | Mild                 |
| Mild clinical signs without hospitalization                                       | Mild                 |
| Mild clinical signs without hospitalization. Diarrhoea                            | Mild                 |
| Mild clinical signs without hospitalization. Distorted ability to smell           | Mild                 |
| Mild clinical signs without hospitalization. Distorted ability to smell and taste | Mild                 |
| Mild clinical signs without hospitalization. Distorted ability to smell and taste | Mild                 |
| Mild clinical signs without hospitalization. Distorted ability to smell.          | Mild                 |
| Mild clinical signs without hospitalization. Distorted ability to taste           | Mild                 |
| Mild Covid                                                                        | Mild                 |
| Mild disease                                                                      | Mild                 |
| Mild disease, full recovery, just rhinorrhea                                      | Mild                 |
| Mild disease, persistent infection                                                | Mild                 |
| Mild infection                                                                    | Mild                 |
| Mild Symphoms                                                                     | Mild                 |
| Mild symptomatology                                                               | Mild                 |
| Mild Symptoms                                                                     | Mild                 |

|                                                                         |                             |
|-------------------------------------------------------------------------|-----------------------------|
| Mild symptoms (fever, cardiovascular disorders)                         | Mild                        |
| Mild symptoms, not-hospitalized                                         | Mild                        |
| Mild symptomatic case                                                   | Mild                        |
| Mild, at home.                                                          | Mild                        |
| Mild, live                                                              | Mild                        |
| mild, unhospitalized                                                    | Mild                        |
| Mild/Contact exposure/Asymptomatic                                      | Asymptomatic / Mild         |
| Mild/Live                                                               | Mild                        |
| Mild/Moderate                                                           | Mild / Moderate             |
| Moderate                                                                | Moderate                    |
| Moderate / Outpatient                                                   | Moderate                    |
| Moderate, Live                                                          | Moderate                    |
| Moderate/Severe                                                         | Moderate / Severe           |
| Multidisciplinary ICU                                                   | Severe                      |
| Nanopore                                                                | Unknown                     |
| Nasal swab                                                              | Unknown                     |
| Nasopharyngeal and oropharyngeal swab                                   | Unknown                     |
| Nasopharyngeal and oropharyngeal swabs                                  | Unknown                     |
| Nasopharyngeal swab                                                     | Unknown                     |
| Neurology ward, Hospitalised                                            | Hospitalized                |
| New York                                                                | Unknown                     |
| NICD outbreak investigation                                             | Unknown                     |
| No clinical signs                                                       | Asymptomatic                |
| No Data                                                                 | Unknown                     |
| No Hospitalized                                                         | Not hospitalized            |
| Non critical hospitalization                                            | Not critically hospitalized |
| Non Hospitalized                                                        | Not hospitalized            |
| Non Severe                                                              | Not severe                  |
| Non-hospitalized                                                        | Not hospitalized            |
| Non-hospitalized                                                        | Not hospitalized            |
| Non-hospitalized, symptoms: cough                                       | Mild                        |
| Non-hospitalized, symptoms: sore throat                                 | Mild                        |
| Non-hospitalized, symptoms: runny nose                                  | Mild                        |
| Not hospitalized                                                        | Not hospitalized            |
| Not Quarantined                                                         | Unknown                     |
| Not vaccinated                                                          | Not vaccinated              |
| Nursing Home                                                            | Unknown                     |
| Nursing house                                                           | Unknown                     |
| Nursing-home                                                            | Unknown                     |
| Obit - Death due to lack of oxygen in the health unit.                  | Dead                        |
| Oligosymptomatic                                                        | Mild                        |
| Oro-pharyngeal swab                                                     | Unknown                     |
| Oronpharyngeal swab                                                     | Unknown                     |
| Oropharyngeal swab                                                      | Unknown                     |
| Other                                                                   | Unknown                     |
| Other acute upper respiratory infections of multiple sites              | Acute infection             |
| Other acute upper respiratory tract infections of multiple localization | Acute infection             |
| Other unidentified viral infections                                     | Unknown                     |
| ou                                                                      | Mild                        |
| Oupatient                                                               | Not hospitalized            |
| out-patient                                                             | Not hospitalized            |
| Outaptient                                                              | Not hospitalized            |
| Outgoing traveler                                                       | Unknown                     |
| Outpatient                                                              | Not hospitalized            |
| OUTPATIENT - HOME MONITORING                                            | Home                        |
| Outpatient Care, Alive                                                  | Not hospitalized            |
| Outpatient mild disease                                                 | Mild                        |
| Outpatient-live                                                         | Not hospitalized            |
| Outpatient, Mild disease                                                | Mild                        |
| Outre mer                                                               | Unknown                     |
| Overseas inflow                                                         | Unknown                     |
| Paediatric casualty                                                     | Casualty                    |
| Paeds casualty                                                          | Casualty                    |
| Pauci-Symptomatic                                                       | Paucisymptomatic            |
| Paucisymptomatic                                                        | Paucisymptomatic            |
| Paucisymptomatyc                                                        | Paucisymptomatic            |
| Paucisymtomatic                                                         | Paucisymptomatic            |
| Paucisymtpmatic                                                         | Paucisymptomatic            |
| Persistent infection                                                    | Chronic infection           |

|                                                                 |                        |
|-----------------------------------------------------------------|------------------------|
| Pneumonia                                                       | Pneumonia              |
| Pneumonia (chest X-ray)                                         | Pneumonia              |
| Pneumonia (chest X-ray), not critical                           | Pneumonia              |
| Pneumonia, unspecified organism                                 | Pneumonia              |
| Positive                                                        | Unknown                |
| Post mortem                                                     | Dead                   |
| Quarantine                                                      | Unknown                |
| Quarantine isolation                                            | Unknown                |
| Quarantined                                                     | Unknown                |
| R05 Cough                                                       | Mild                   |
| R06.0 Dyspnoea, Orthopnoea, Shortness of breath                 | Symptomatic            |
| R43.0 Anosmia                                                   | Mild                   |
| R50 Fever of other and unknown origin                           | Mild                   |
| R50.9 Fever, unspecified                                        | Mild                   |
| R51 Headache                                                    | Mild                   |
| R53 Malaise and fatigue                                         | Mild                   |
| random surveillance                                             | Screening              |
| Re-infection/moderate/live                                      | Moderate / Reinfection |
| Rebased                                                         | Unknown                |
| Recover                                                         | Recovered              |
| Recovered                                                       | Recovered              |
| Recovering                                                      | Recovered              |
| Recovery                                                        | Recovered              |
| Recovery 2021-04-18                                             | Recovered              |
| Referido                                                        | Unknown                |
| Reinfected                                                      | Reinfection            |
| Reinfection                                                     | Reinfection            |
| Release                                                         | Released               |
| Released                                                        | Released               |
| Released / Lepas Rawat                                          | Released               |
| Released, Live                                                  | Released               |
| Respiratory disease                                             | Symptomatic            |
| Retesting                                                       | Unknown                |
| Routine                                                         | Screening              |
| Routine general health check-up of other defined subpopulations | Screening              |
| Sance Asymptomatic                                              | Asymptomatic           |
| Screen                                                          | Screening              |
| Screened for travel                                             | Screening              |
| screening                                                       | Screening              |
| Serious                                                         | Serious                |
| Sever/hospitalised                                              | Severe / Hospitalized  |
| Severa                                                          | Severe                 |
| Severe                                                          | Severe                 |
| Severe (Hospitalized)                                           | Severe / Hospitalized  |
| Severe / ICU                                                    | Severe / Hospitalized  |
| Severe clinical signs                                           | Severe                 |
| Severe infection                                                | Severe                 |
| Severe symptoms with underlying asthma and hypertension         | Severe                 |
| Severe, hospitalized                                            | Severe                 |
| Severe, Live                                                    | Severe                 |
| Severo                                                          | Severe                 |
| Sick                                                            | Symptomatic            |
| sore throat, sweating, T-norm                                   | Mild                   |
| Stable                                                          | Stable                 |
| Stable in quarantine                                            | Mild                   |
| Sudden death                                                    | Dead                   |
| Surveillance                                                    | Screening              |
| Suspect                                                         | Unknown                |
| Suspect-SAD                                                     | Unknown                |
| Suspect/SAD/SAD                                                 | Unknown                |
| Suspect/SAD/SAD/SAD                                             | Unknown                |
| Suspected                                                       | Unknown                |
| Suspected Corona                                                | Unknown                |
| Suspected coronavirus infection                                 | Unknown                |
| Symptomatic                                                     | Symptomatic            |
| symptomatic                                                     | Symptomatic            |
| Symptomatic mild disease                                        | Mild                   |
| Symptomatic - Ambulatory                                        | Ambulatory             |
| Symptomatic - Hospitalized                                      | Hospitalized           |

|                                                                        |                           |
|------------------------------------------------------------------------|---------------------------|
| Symptomatic ambulatory                                                 | Ambulatory                |
| Symptomatic and Ambulatory                                             | Ambulatory                |
| Symptomatic and Hospitalized                                           | Hospitalized              |
| Symptomatic COVID-19                                                   | Symptomatic               |
| Symptomatic, Outpatient                                                | Outpatient                |
| Symptomatic/mild illness/Live                                          | Mild                      |
| Symptomatic/Reinfection                                                | Symptomatic / Reinfection |
| Symptoms indicative of upper respiratory infection                     | Symptomatic               |
| Symptoms: fever, general discomfort, headache, cough, rhinorrhea.      | Mild                      |
| Symptoms: fever, general discomfort, muscle or joint pain, headache,   | Mild                      |
| Symptoms: fever, general discomfort, muscle or joint pain, headache,   | Mild                      |
| Symptoms: fever, general discomfort, muscle or joint pain, headache,   | Mild                      |
| Symptoms: fever, headache, loss of smell.                              | Mild                      |
| Symptoms: general discomfort, muscle or joint pain, headache, cough,   | Mild                      |
| Throat                                                                 | Mild                      |
| Trauma                                                                 | Symptomatic               |
| U07.1 Coronavirus infection caused by the COVID-19 virus, the virus ha | Unknown                   |
| U07.1 COVID-19, virus identified                                       | Unknown                   |
| U07.2 Coronavirus infection caused by COVID-19 virus, virus not identi | Unknown                   |
| U07.2 COVID-19, virus not identified                                   | Unknown                   |
| UCI                                                                    | Unknown                   |
| unknown                                                                | Unknown                   |
| Umknown                                                                | Unknown                   |
| Undetlying DM and Ischemic Heart Disease                               | Unknown                   |
| UNK                                                                    | Unknown                   |
| unknkown                                                               | Unknown                   |
| unknonw                                                                | Unknown                   |
| unknow                                                                 | Unknown                   |
| unknwon                                                                | Unknown                   |
| unkonown                                                               | Unknown                   |
| unkonwn                                                                | Unknown                   |
| unkown                                                                 | Unknown                   |
| Vaccinated                                                             | Vaccinated                |
| Vaccinated & Demise                                                    | Dead / Vaccinated         |
| Vaccine escape                                                         | Vaccinated                |
| Vaccine escape/ Live                                                   | Vaccinated                |
| Vaccine escape/Live                                                    | Vaccinated                |
| Vaccine escape/mild/Live                                               | Vaccinated / Mild         |
| Very Severe                                                            | Severe                    |
| Voyageur                                                               | Unknown                   |
| x                                                                      | Unknown                   |
| Z00 General medical examination                                        | Unknown                   |
| Z00.0 General medical examination                                      | Unknown                   |
| Z01 Other special examinations and investigations of persons without   | Unknown                   |
| Z01.7 Laboratory examination                                           | Unknown                   |
| Z04.9 Examination and observation for unspecified reason               | Unknown                   |
| Z11.5                                                                  | Unknown                   |
| Z11.5 Special screening examination for other viral diseases           | Unknown                   |
| Z13.9 Special screening examination, unspecified                       | Unknown                   |
| Z20.0 Contact with and exposure to intestinal infectious diseases      | Screening                 |
| Z20.8 Contact with and exposure to other communicable diseases         | Screening                 |
